# Supplementary material
Source: publisher figshare collection journal article supplement (https://acs.figshare.com/ndownloader/files/7716082)

# checkCIF/PLATON report

You have not supplied any structure factors. As a result the full set of tests cannot be run.

THIS REPORT IS FOR GUIDANCE ONLY. IF USED AS PART OF A REVIEW PROCEDURE FOR PUBLICATION, IT SHOULD NOT REPLACE THE EXPERTISE OF AN EXPERIENCED CRYSTALLOGRAPHIC REFEREE.

No syntax errors found.      CIF dictionary      Interpreting this report

## Datablock: a

---

|                 |                  |                                |
|-----------------|------------------|--------------------------------|
| Bond precision: | C-C = 0.0040 Å   | Wavelength=0.71073             |
| Cell:           | a=9.7735(3)      | b=12.0104(4)      c=13.4634(5) |
|                 | alpha=106.275(1) | beta=90      gamma=90.065(2)   |
| Temperature:    | 296 K            |                                |
|                 | Calculated       | Reported                       |
| Volume          | 1517.05(9)       | 1517.05(9)                     |
| Space group     | P -1             | P-1                            |
| Hall group      | -P 1             | ?                              |
| Moiety formula  | C18 H10 F4 O3    | ?                              |
| Sum formula     | C18 H10 F4 O3    | C18 H10 F4 O3                  |
| Mr              | 350.26           | 350.26                         |
| Dx,g cm-3       | 1.534            | 1.534                          |
| Z               | 4                | 4                              |
| Mu (mm-1)       | 0.136            | 0.136                          |
| F000            | 712.0            | 712.0                          |
| F000'           | 712.56           |                                |
| h,k,lmax        | 12,15,17         | 12,15,17                       |
| Nref            | 6980             | 6625                           |
| Tmin,Tmax       | 0.966,0.981      | 0.965,0.981                    |
| Tmin'           | 0.965            |                                |

Correction method= # Reported T Limits: Tmin=0.965 Tmax=0.981  
AbsCorr = EMPIRICAL

|                               |                                 |
|-------------------------------|---------------------------------|
| Data completeness= 0.949      | Theta(max)= 27.510              |
| R(reflections)= 0.0951( 4737) | wR2(reflections)= 0.2929( 6625) |
| S = 1.049                     | Npar= 451                       |

---

The following ALERTS were generated. Each ALERT has the format

**test-name\_ALERT\_alert-type\_alert-level.**

Click on the hyperlinks for more details of the test.

---

### Alert level B

SYMS02\_ALERT\_1\_B Two angles should be 90 for a monoclinic cell

Cell 9.7735 12.0104 13.4634

Angles 106.2750 90.0000 90.0650

**Author Response:** Although the two angles are almost 90, the cell is not monoclinic. The checking program PLATON did not find a symmetry higher than triclinic. If the data was averaged in a monoclinic space group C2/c setting, the Rint is equal to but any fragment of the structure is not determined.

PLAT029\_ALERT\_3\_B \_diffrn\_measured\_fraction\_theta\_full value Low . 0.950 Note

**Author Response:** We made several attempts to obtain better quality data for this structure, after a number of attempts of data collection, the reported one is found to be the best one.

---

### Alert level C

ABSTY02\_ALERT\_1\_C An \_exptl\_absorpt\_correction\_type has been given without a literature citation. This should be contained in the \_exptl\_absorpt\_process\_details field.

Absorption correction given as empirical

CRYSC01\_ALERT\_1\_C The word below has not been recognised as a standard identifier.

clourless

CRYSC01\_ALERT\_1\_C No recognised colour has been given for crystal colour.

DIFMX02\_ALERT\_1\_C The maximum difference density is > 0.1\*ZMAX\*0.75

The relevant atom site should be identified.

PLAT084\_ALERT\_3\_C High wR2 Value (i.e. > 0.25) ..... 0.29 Report

PLAT094\_ALERT\_2\_C Ratio of Maximum / Minimum Residual Density .... 2.13 Report

PLAT097\_ALERT\_2\_C Large Reported Max. (Positive) Residual Density 0.81 eA-3

---

### Alert level G

PLAT005\_ALERT\_5\_G No Embedded Refinement Details found in the CIF Please Do !

PLAT066\_ALERT\_1\_G Predicted and Reported Tmin&Tmax Range Identical ? Check

PLAT072\_ALERT\_2\_G SHELXL First Parameter in WGHT Unusually Large 0.19 Report

PLAT093\_ALERT\_1\_G No s.u.'s on H-positions, Refinement Reported as mixed Check

PLAT104\_ALERT\_1\_G The Reported Crystal System is Inconsistent with P-1 Check

PLAT145\_ALERT\_4\_G s.u. on beta Small or Missing ..... 0.0000 Degree

PLAT242\_ALERT\_2\_G Low 'MainMol' Ueq as Compared to Neighbors of C36 Check

PLAT242\_ALERT\_2\_G Low 'MainMol' Ueq as Compared to Neighbors of C35 Check

PLAT333\_ALERT\_2\_G Check Large Av C6-Ring C-C Dist. C25 -C30 1.44 Ang.

PLAT333\_ALERT\_2\_G Check Large Av C6-Ring C-C Dist. C8 -C13 1.45 Ang.

PLAT335\_ALERT\_2\_G Check Large C6 Ring C-C Range C25 -C30 0.16 Ang.

PLAT335\_ALERT\_2\_G Check Large C6 Ring C-C Range C8 -C13 0.17 Ang.

PLAT802\_ALERT\_4\_G CIF Input Record(s) with more than 80 Characters 2 Info

PLAT899\_ALERT\_4\_G SHELXL97 is Deprecated and Succeeded by SHELXL 2014 Note

---

0 **ALERT level A** = Most likely a serious problem - resolve or explain  
2 **ALERT level B** = A potentially serious problem, consider carefully  
7 **ALERT level C** = Check. Ensure it is not caused by an omission or oversight  
14 **ALERT level G** = General information/check it is not something unexpected

8 ALERT type 1 CIF construction/syntax error, inconsistent or missing data  
9 ALERT type 2 Indicator that the structure model may be wrong or deficient  
2 ALERT type 3 Indicator that the structure quality may be low  
3 ALERT type 4 Improvement, methodology, query or suggestion  
1 ALERT type 5 Informative message, check

---

---

It is advisable to attempt to resolve as many as possible of the alerts in all categories. Often the minor alerts point to easily fixed oversights, errors and omissions in your CIF or refinement strategy, so attention to these fine details can be worthwhile. In order to resolve some of the more serious problems it may be necessary to carry out additional measurements or structure refinements. However, the purpose of your study may justify the reported deviations and the more serious of these should normally be commented upon in the discussion or experimental section of a paper or in the "special\_details" fields of the CIF. checkCIF was carefully designed to identify outliers and unusual parameters, but every test has its limitations and alerts that are not important in a particular case may appear. Conversely, the absence of alerts does not guarantee there are no aspects of the results needing attention. It is up to the individual to critically assess their own results and, if necessary, seek expert advice.

### **Publication of your CIF in IUCr journals**

A basic structural check has been run on your CIF. These basic checks will be run on all CIFs submitted for publication in IUCr journals (*Acta Crystallographica*, *Journal of Applied Crystallography*, *Journal of Synchrotron Radiation*); however, if you intend to submit to *Acta Crystallographica Section C* or *E* or *IUCrData*, you should make sure that full publication checks are run on the final version of your CIF prior to submission.

### **Publication of your CIF in other journals**

Please refer to the *Notes for Authors* of the relevant journal for any special instructions relating to CIF submission.

---

**PLATON version of 24/11/2016; check.def file version of 23/11/2016**

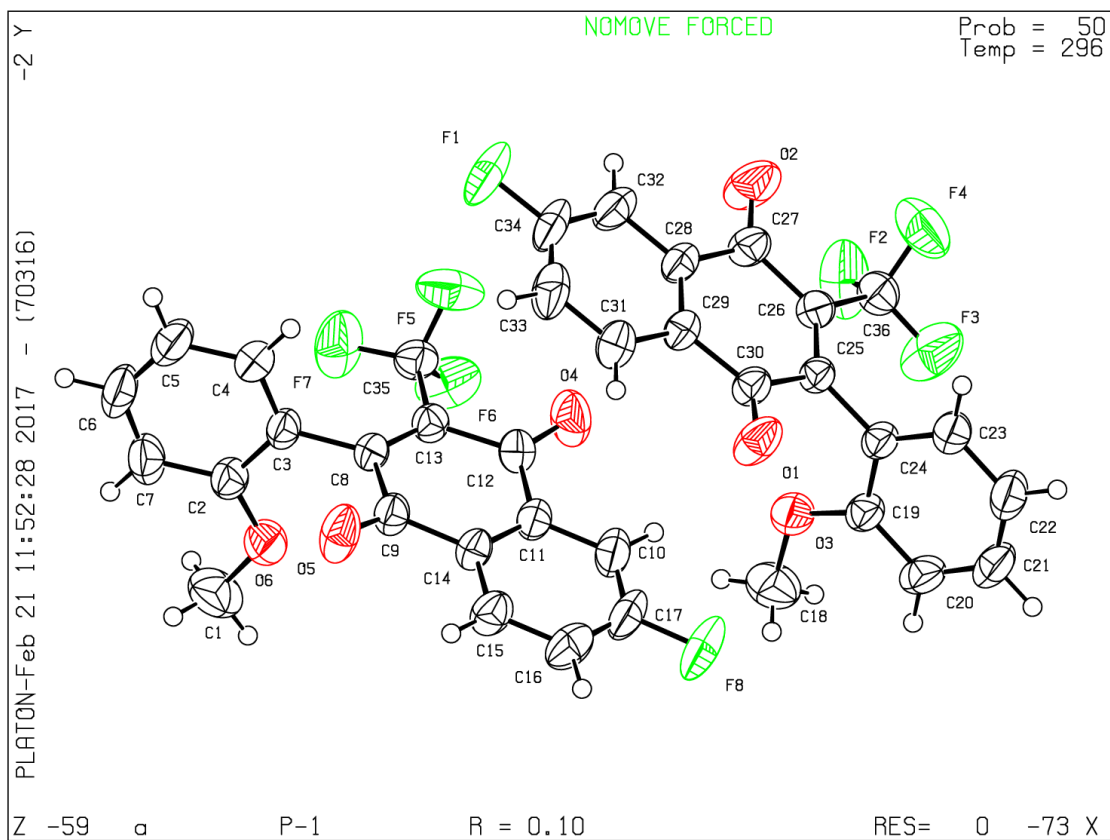

Supplement: Supplementary file 1 [file 7716082 › X-ray of 3w final/checkcif of 3w (new).pdf]
