# Supplementary material
Source: publisher figshare collection journal article supplement (https://acs.figshare.com/ndownloader/files/7716082)
Supplement: Supplementary file 1 [file 7716082]

Archive with 3 entries (2 files):
- X-ray of 3w final/
- X-ray of 3w final/3w.CIF
- X-ray of 3w final/checkcif of 3w (new).pdf
