# Supplementary material
Source: publisher figshare collection journal article supplement (https://acs.figshare.com/ndownloader/files/7716082)
Supplement: Supplementary file 1 [file 7716082 › X-ray of 3w final/3w.CIF]

 
data_a 
 
_audit_creation_method            SHELXL-97 
_chemical_name_systematic 
; 
 ? 
; 
_chemical_name_common             ? 
_chemical_melting_point           ? 
_chemical_formula_moiety          ? 
_chemical_formula_sum 
 'C18 H10 F4 O3' 
_chemical_formula_weight          350.26 
 
loop_ 
 _atom_type_symbol 
 _atom_type_description 
 _atom_type_scat_dispersion_real 
 _atom_type_scat_dispersion_imag 
 _atom_type_scat_source 
 'C'  'C'   0.0033   0.0016 
 'International Tables Vol C Tables 4.2.6.8 and 6.1.1.4' 
 'H'  'H'   0.0000   0.0000 
 'International Tables Vol C Tables 4.2.6.8 and 6.1.1.4' 
 'F'  'F'   0.0171   0.0103 
 'International Tables Vol C Tables 4.2.6.8 and 6.1.1.4' 
 'O'  'O'   0.0106   0.0060 
 'International Tables Vol C Tables 4.2.6.8 and 6.1.1.4' 
 
_symmetry_cell_setting            monoclinic 
_symmetry_space_group_name_H-M    P-1 
 
loop_ 
 _symmetry_equiv_pos_as_xyz 
 'x, y, z' 
 '-x, -y, -z' 
 
_cell_length_a                    9.7735(3) 
_cell_length_b                    12.0104(4) 
_cell_length_c                    13.4634(5) 
_cell_angle_alpha                 106.2750(10) 
_cell_angle_beta                  90.00 
_cell_angle_gamma                 90.065(2) 
_cell_volume                      1517.05(9) 
_cell_formula_units_Z             4 
_cell_measurement_temperature     296(2) 
_cell_measurement_reflns_used     38274 
_cell_measurement_theta_min       0.95 
_cell_measurement_theta_max       27.51 
 
_exptl_crystal_description        block 
_exptl_crystal_colour             clourless 
_exptl_crystal_size_max           0.26 
_exptl_crystal_size_mid           0.21 
_exptl_crystal_size_min           0.14 
_exptl_crystal_density_meas       ? 
_exptl_crystal_density_diffrn     1.534 
_exptl_crystal_density_method     'not measured' 
_exptl_crystal_F_000              712 
_exptl_absorpt_coefficient_mu     0.136 
_exptl_absorpt_correction_type    empirical 
_exptl_absorpt_correction_T_min   0.9654 
_exptl_absorpt_correction_T_max   0.9812 
_exptl_absorpt_process_details    ? 
 
_exptl_special_details 
; 
 ? 
; 
 
_diffrn_ambient_temperature       296(2) 
_diffrn_radiation_wavelength      0.71073 
_diffrn_radiation_type            MoK\a 
_diffrn_radiation_source          'fine-focus sealed tube' 
_diffrn_radiation_monochromator   graphite 
_diffrn_measurement_device_type   'Bruker SMART APEX II CCD area detector' 
_diffrn_measurement_method        'phi and omega scans' 
_diffrn_detector_area_resol_mean  ? 
_diffrn_standards_number          ? 
_diffrn_standards_interval_count  ? 
_diffrn_standards_interval_time   ? 
_diffrn_standards_decay_%         ? 
_diffrn_reflns_number             38274 
_diffrn_reflns_av_R_equivalents   0.0550 
_diffrn_reflns_av_sigmaI/netI     0.0352 
_diffrn_reflns_limit_h_min        -12 
_diffrn_reflns_limit_h_max        12 
_diffrn_reflns_limit_k_min        -15 
_diffrn_reflns_limit_k_max        15 
_diffrn_reflns_limit_l_min        -17 
_diffrn_reflns_limit_l_max        17 
_diffrn_reflns_theta_min          1.58 
_diffrn_reflns_theta_max          27.51 
_reflns_number_total              6625 
_reflns_number_gt                 4737 
_reflns_threshold_expression      >2sigma(I) 
 
_computing_data_collection        'Bruker SMART' 
_computing_cell_refinement        'Bruker SMART' 
_computing_data_reduction         'Bruker SAINT' 
_computing_structure_solution     'SHELXS-97 (Sheldrick, 1990)' 
_computing_structure_refinement   'SHELXL-97 (Sheldrick, 1997)' 
_computing_molecular_graphics     'Bruker SHELXTL' 
_computing_publication_material   'Bruker SHELXTL'
 
_refine_special_details 
; 
 Refinement of F^2^ against ALL reflections.  The weighted R-factor wR and 
 goodness of fit S are based on F^2^, conventional R-factors R are based 
 on F, with F set to zero for negative F^2^. The threshold expression of 
 F^2^ > 2sigma(F^2^) is used only for calculating R-factors(gt) etc. and is 
 not relevant to the choice of reflections for refinement.  R-factors based 
 on F^2^ are statistically about twice as large as those based on F, and R- 
 factors based on ALL data will be even larger. 
; 
 
_refine_ls_structure_factor_coef  Fsqd  
_refine_ls_matrix_type            full 
_refine_ls_weighting_scheme       calc  
_refine_ls_weighting_details 
 'calc w=1/[\s^2^(Fo^2^)+(0.1947P)^2^+0.3876P] where P=(Fo^2^+2Fc^2^)/3' 
_atom_sites_solution_primary      direct 
_atom_sites_solution_secondary    difmap 
_atom_sites_solution_hydrogens    geom 
_refine_ls_hydrogen_treatment     mixed 
_refine_ls_extinction_method      none 
_refine_ls_extinction_coef        ? 
_refine_ls_number_reflns          6625 
_refine_ls_number_parameters      451 
_refine_ls_number_restraints      0 
_refine_ls_R_factor_all           0.1125 
_refine_ls_R_factor_gt            0.0951 
_refine_ls_wR_factor_ref          0.2929 
_refine_ls_wR_factor_gt           0.2711 
_refine_ls_goodness_of_fit_ref    1.049 
_refine_ls_restrained_S_all       1.049 
_refine_ls_shift/su_max           0.006 
_refine_ls_shift/su_mean          0.002 
 
loop_ 
 _atom_site_label 
 _atom_site_type_symbol 
 _atom_site_fract_x 
 _atom_site_fract_y 
 _atom_site_fract_z 
 _atom_site_U_iso_or_equiv 
 _atom_site_adp_type 
 _atom_site_occupancy 
 _atom_site_symmetry_multiplicity 
 _atom_site_calc_flag 
 _atom_site_refinement_flags 
 _atom_site_disorder_assembly 
 _atom_site_disorder_group 
C1 C 0.1256(4) 0.0687(4) -0.1436(4) 0.0808(11) Uani 1 1 d . . . 
H1A H 0.0935 0.0334 -0.0921 0.121 Uiso 1 1 calc R . . 
H1B H 0.1532 0.0093 -0.2043 0.121 Uiso 1 1 calc R . . 
H1C H 0.0535 0.1139 -0.1612 0.121 Uiso 1 1 calc R . . 
C2 C 0.2981(3) 0.1995(2) -0.1666(2) 0.0481(6) Uani 1 1 d . . . 
C3 C 0.4139(3) 0.2634(2) -0.12473(18) 0.0429(6) Uani 1 1 d . . . 
C4 C 0.4836(3) 0.3252(3) -0.1814(2) 0.0524(6) Uani 1 1 d . . . 
H4A H 0.5605 0.3682 -0.1533 0.063 Uiso 1 1 calc R . . 
C5 C 0.4399(4) 0.3235(3) -0.2798(2) 0.0629(8) Uani 1 1 d . . . 
H5A H 0.4869 0.3653 -0.3176 0.075 Uiso 1 1 calc R . . 
C6 C 0.3268(4) 0.2598(3) -0.3206(2) 0.0659(9) Uani 1 1 d . . . 
H6A H 0.2980 0.2582 -0.3869 0.079 Uiso 1 1 calc R . . 
C7 C 0.2544(3) 0.1977(3) -0.2659(2) 0.0617(8) Uani 1 1 d . . . 
H7A H 0.1775 0.1551 -0.2948 0.074 Uiso 1 1 calc R . . 
C8 C 0.4562(2) 0.2660(2) -0.01767(18) 0.0386(5) Uani 1 1 d . . . 
C9 C 0.3809(3) 0.3555(2) 0.06559(19) 0.0443(6) Uani 1 1 d . . . 
C10 C 0.5187(3) 0.2912(3) 0.3039(2) 0.0571(7) Uani 1 1 d . . . 
H10A H 0.5851 0.2454 0.3225 0.068 Uiso 1 1 calc R . . 
C11 C 0.4988(3) 0.2873(2) 0.20003(19) 0.0433(6) Uani 1 1 d . . . 
C12 C 0.5851(3) 0.2090(2) 0.1193(2) 0.0452(6) Uani 1 1 d . . . 
C13 C 0.5511(2) 0.1988(2) 0.00840(19) 0.0409(5) Uani 1 1 d . . . 
C14 C 0.4013(3) 0.3580(2) 0.17425(19) 0.0431(6) Uani 1 1 d . . . 
C15 C 0.3219(3) 0.4323(3) 0.2517(2) 0.0547(7) Uani 1 1 d . . . 
H15A H 0.2564 0.4798 0.2344 0.066 Uiso 1 1 calc R . . 
C16 C 0.3412(4) 0.4348(3) 0.3544(2) 0.0636(8) Uani 1 1 d . . . 
H16A H 0.2894 0.4835 0.4067 0.076 Uiso 1 1 calc R . . 
C17 C 0.4393(4) 0.3631(3) 0.3769(2) 0.0634(8) Uani 1 1 d . . . 
C18 C 0.6173(3) 0.0759(3) 0.4368(3) 0.0745(10) Uani 1 1 d . . . 
H18A H 0.5829 0.0393 0.3686 0.112 Uiso 1 1 calc R . . 
H18B H 0.5479 0.1252 0.4767 0.112 Uiso 1 1 calc R . . 
H18C H 0.6419 0.0177 0.4699 0.112 Uiso 1 1 calc R . . 
C19 C 0.7977(3) 0.2029(2) 0.5194(2) 0.0439(6) Uani 1 1 d . . . 
C20 C 0.7573(3) 0.2016(3) 0.6185(2) 0.0555(7) Uani 1 1 d . . . 
H20A H 0.6816 0.1584 0.6273 0.067 Uiso 1 1 calc R . . 
C21 C 0.8306(3) 0.2650(3) 0.7035(2) 0.0603(8) Uani 1 1 d . . . 
H21A H 0.8038 0.2640 0.7695 0.072 Uiso 1 1 calc R . . 
C22 C 0.9420(3) 0.3292(3) 0.6919(2) 0.0614(8) Uani 1 1 d . . . 
H22A H 0.9903 0.3714 0.7497 0.074 Uiso 1 1 calc R . . 
C23 C 0.9827(3) 0.3313(3) 0.5937(2) 0.0525(6) Uani 1 1 d . . . 
H23A H 1.0580 0.3755 0.5860 0.063 Uiso 1 1 calc R . . 
C24 C 0.9115(2) 0.2677(2) 0.50685(19) 0.0413(5) Uani 1 1 d . . . 
C25 C 0.9517(2) 0.2698(2) 0.40059(18) 0.0379(5) Uani 1 1 d . . . 
C26 C 1.0469(2) 0.2026(2) 0.3408(2) 0.0414(5) Uani 1 1 d . . . 
C27 C 1.0800(3) 0.2120(2) 0.2346(2) 0.0486(6) Uani 1 1 d . . . 
C28 C 0.9942(3) 0.2912(2) 0.19306(19) 0.0440(6) Uani 1 1 d . . . 
C29 C 0.8962(3) 0.3616(2) 0.25510(19) 0.0421(5) Uani 1 1 d . . . 
C30 C 0.8757(3) 0.3584(2) 0.36234(19) 0.0429(6) Uani 1 1 d . . . 
C31 C 0.8157(3) 0.4351(3) 0.2141(2) 0.0546(7) Uani 1 1 d . . . 
H31A H 0.7489 0.4815 0.2546 0.066 Uiso 1 1 calc R . . 
C32 C 1.0151(3) 0.2948(3) 0.0914(2) 0.0582(7) Uani 1 1 d . . . 
H32A H 1.0818 0.2493 0.0499 0.070 Uiso 1 1 calc R . . 
C33 C 0.8364(4) 0.4380(3) 0.1133(3) 0.0665(9) Uani 1 1 d . . . 
H33A H 0.7848 0.4870 0.0856 0.080 Uiso 1 1 calc R . . 
C34 C 0.9346(4) 0.3672(3) 0.0549(2) 0.0634(8) Uani 1 1 d . . . 
C35 C 0.6331(3) 0.1062(3) -0.0702(2) 0.0515(6) Uani 1 1 d . . . 
C36 C 1.1275(3) 0.1103(2) 0.3722(2) 0.0514(6) Uani 1 1 d . . . 
O1 O 0.7997(2) 0.4267(2) 0.42070(16) 0.0675(7) Uani 1 1 d . . . 
O2 O 1.1729(3) 0.1575(3) 0.1850(2) 0.0854(9) Uani 1 1 d . . . 
O3 O 0.7349(2) 0.14365(19) 0.42946(16) 0.0573(5) Uani 1 1 d . . . 
O4 O 0.6806(2) 0.1568(2) 0.14121(18) 0.0712(7) Uani 1 1 d . . . 
O5 O 0.3060(3) 0.4236(2) 0.04111(16) 0.0722(7) Uani 1 1 d . . . 
O6 O 0.2390(2) 0.1417(2) -0.10387(17) 0.0603(6) Uani 1 1 d . . . 
F1 F 0.9530(3) 0.3691(2) -0.04441(15) 0.0962(8) Uani 1 1 d . . . 
F2 F 1.1221(3) 0.01023(17) 0.3024(2) 0.0987(9) Uani 1 1 d . . . 
F3 F 1.0902(3) 0.0936(2) 0.4605(2) 0.1064(10) Uani 1 1 d . . . 
F4 F 1.2587(2) 0.1390(2) 0.3852(2) 0.0972(8) Uani 1 1 d . . . 
F5 F 0.7622(2) 0.1371(2) -0.0706(2) 0.0904(8) Uani 1 1 d . . . 
F6 F 0.6311(2) 0.00614(16) -0.04827(18) 0.0826(7) Uani 1 1 d . . . 
F7 F 0.5894(3) 0.0867(2) -0.16583(16) 0.0985(9) Uani 1 1 d . . . 
F8 F 0.4560(3) 0.3654(2) 0.47694(14) 0.0950(8) Uani 1 1 d . . . 
 
loop_ 
 _atom_site_aniso_label 
 _atom_site_aniso_U_11 
 _atom_site_aniso_U_22 
 _atom_site_aniso_U_33 
 _atom_site_aniso_U_23 
 _atom_site_aniso_U_13 
 _atom_site_aniso_U_12 
C1 0.0569(18) 0.087(3) 0.094(3) 0.019(2) -0.0087(18) -0.0202(18) 
C2 0.0496(14) 0.0553(15) 0.0360(13) 0.0074(11) -0.0015(10) 0.0044(11) 
C3 0.0481(13) 0.0492(14) 0.0296(11) 0.0080(10) -0.0013(9) 0.0066(10) 
C4 0.0528(14) 0.0660(17) 0.0400(14) 0.0173(12) 0.0022(11) 0.0000(12) 
C5 0.078(2) 0.077(2) 0.0405(15) 0.0271(14) 0.0080(14) 0.0105(17) 
C6 0.084(2) 0.083(2) 0.0307(13) 0.0146(14) -0.0046(13) 0.0200(18) 
C7 0.0612(17) 0.075(2) 0.0422(15) 0.0053(14) -0.0129(12) 0.0100(15) 
C8 0.0413(11) 0.0415(12) 0.0309(11) 0.0069(9) -0.0011(9) -0.0004(9) 
C9 0.0500(13) 0.0472(13) 0.0342(12) 0.0087(10) -0.0024(10) 0.0079(10) 
C10 0.0672(17) 0.0684(18) 0.0409(15) 0.0239(13) -0.0127(12) -0.0088(14) 
C11 0.0496(13) 0.0472(13) 0.0348(12) 0.0142(10) -0.0051(10) -0.0051(10) 
C12 0.0489(13) 0.0452(13) 0.0428(14) 0.0146(11) -0.0060(10) 0.0019(10) 
C13 0.0431(12) 0.0412(12) 0.0363(12) 0.0073(10) -0.0012(9) 0.0007(9) 
C14 0.0524(13) 0.0434(13) 0.0319(12) 0.0076(10) -0.0007(10) 0.0016(10) 
C15 0.0648(17) 0.0563(16) 0.0396(14) 0.0079(12) 0.0056(12) 0.0073(13) 
C16 0.082(2) 0.0649(19) 0.0377(15) 0.0044(13) 0.0120(14) -0.0005(16) 
C17 0.088(2) 0.075(2) 0.0289(13) 0.0177(13) -0.0033(13) -0.0133(17) 
C18 0.0585(18) 0.075(2) 0.091(3) 0.026(2) -0.0001(17) -0.0179(16) 
C19 0.0468(13) 0.0482(13) 0.0414(13) 0.0203(11) 0.0042(10) 0.0034(10) 
C20 0.0561(15) 0.0643(17) 0.0564(17) 0.0339(14) 0.0151(13) 0.0083(13) 
C21 0.076(2) 0.0719(19) 0.0402(15) 0.0282(14) 0.0118(13) 0.0164(15) 
C22 0.0728(19) 0.075(2) 0.0371(14) 0.0161(14) -0.0057(13) 0.0069(16) 
C23 0.0538(14) 0.0640(17) 0.0411(14) 0.0172(12) -0.0037(11) -0.0073(12) 
C24 0.0443(12) 0.0466(13) 0.0369(12) 0.0181(10) 0.0034(9) 0.0042(10) 
C25 0.0401(11) 0.0404(12) 0.0353(12) 0.0139(9) 0.0001(9) -0.0022(9) 
C26 0.0420(12) 0.0411(12) 0.0421(13) 0.0132(10) 0.0023(9) 0.0022(9) 
C27 0.0528(14) 0.0501(14) 0.0413(14) 0.0101(11) 0.0084(11) 0.0052(11) 
C28 0.0540(14) 0.0463(13) 0.0311(12) 0.0098(10) 0.0015(10) -0.0059(11) 
C29 0.0510(13) 0.0425(13) 0.0354(12) 0.0153(10) 0.0003(10) -0.0017(10) 
C30 0.0490(13) 0.0432(13) 0.0390(13) 0.0155(10) 0.0051(10) 0.0075(10) 
C31 0.0686(17) 0.0528(15) 0.0472(15) 0.0218(12) -0.0044(13) 0.0024(13) 
C32 0.0722(18) 0.0676(18) 0.0334(14) 0.0120(13) 0.0075(12) -0.0104(15) 
C33 0.090(2) 0.0666(19) 0.0540(18) 0.0350(15) -0.0184(16) -0.0090(17) 
C34 0.094(2) 0.0710(19) 0.0299(13) 0.0227(13) -0.0081(14) -0.0195(17) 
C35 0.0479(14) 0.0560(16) 0.0492(15) 0.0124(12) 0.0083(11) 0.0106(11) 
C36 0.0500(14) 0.0505(15) 0.0552(16) 0.0174(12) 0.0004(12) 0.0115(11) 
O1 0.0887(15) 0.0707(14) 0.0486(12) 0.0255(10) 0.0233(11) 0.0390(12) 
O2 0.0966(18) 0.0982(19) 0.0649(15) 0.0285(14) 0.0380(14) 0.0487(16) 
O3 0.0545(11) 0.0669(13) 0.0530(12) 0.0208(10) -0.0027(9) -0.0168(9) 
O4 0.0734(14) 0.0785(15) 0.0620(14) 0.0198(12) -0.0129(11) 0.0296(12) 
O5 0.0963(17) 0.0753(15) 0.0437(11) 0.0145(10) -0.0007(11) 0.0462(13) 
O6 0.0565(11) 0.0690(13) 0.0558(12) 0.0182(10) -0.0086(9) -0.0160(10) 
F1 0.148(2) 0.1138(19) 0.0359(10) 0.0356(11) -0.0024(11) -0.0151(16) 
F2 0.145(2) 0.0511(11) 0.0914(16) 0.0055(11) -0.0394(15) 0.0289(12) 
F3 0.130(2) 0.1168(19) 0.1005(18) 0.0757(16) 0.0417(15) 0.0672(17) 
F4 0.0609(12) 0.1050(18) 0.139(2) 0.0567(17) -0.0266(13) 0.0030(11) 
F5 0.0577(11) 0.0914(15) 0.1081(18) 0.0050(13) 0.0306(11) 0.0003(10) 
F6 0.1040(16) 0.0511(10) 0.0905(15) 0.0160(10) 0.0340(12) 0.0225(10) 
F7 0.1202(18) 0.1071(18) 0.0484(11) -0.0108(11) -0.0034(11) 0.0563(15) 
F8 0.143(2) 0.1136(19) 0.0314(10) 0.0255(11) -0.0043(11) -0.0053(16) 
 
_geom_special_details 
; 
 All esds (except the esd in the dihedral angle between two l.s. planes) 
 are estimated using the full covariance matrix.  The cell esds are taken 
 into account individually in the estimation of esds in distances, angles 
 and torsion angles; correlations between esds in cell parameters are only 
 used when they are defined by crystal symmetry.  An approximate (isotropic) 
 treatment of cell esds is used for estimating esds involving l.s. planes. 
; 
 
loop_ 
 _geom_bond_atom_site_label_1 
 _geom_bond_atom_site_label_2 
 _geom_bond_distance 
 _geom_bond_site_symmetry_2 
 _geom_bond_publ_flag 
C1 O6 1.421(4) . ? 
C1 H1A 0.9600 . ? 
C1 H1B 0.9600 . ? 
C1 H1C 0.9600 . ? 
C2 O6 1.363(3) . ? 
C2 C3 1.394(4) . ? 
C2 C7 1.397(4) . ? 
C3 C4 1.383(4) . ? 
C3 C8 1.492(3) . ? 
C4 C5 1.387(4) . ? 
C4 H4A 0.9300 . ? 
C5 C6 1.368(5) . ? 
C5 H5A 0.9300 . ? 
C6 C7 1.381(5) . ? 
C6 H6A 0.9300 . ? 
C7 H7A 0.9300 . ? 
C8 C13 1.340(3) . ? 
C8 C9 1.510(3) . ? 
C9 O5 1.211(3) . ? 
C9 C14 1.468(3) . ? 
C10 C17 1.357(5) . ? 
C10 C11 1.399(4) . ? 
C10 H10A 0.9300 . ? 
C11 C14 1.384(4) . ? 
C11 C12 1.485(4) . ? 
C12 O4 1.207(3) . ? 
C12 C13 1.500(4) . ? 
C13 C35 1.530(3) . ? 
C14 C15 1.403(4) . ? 
C15 C16 1.387(4) . ? 
C15 H15A 0.9300 . ? 
C16 C17 1.378(5) . ? 
C16 H16A 0.9300 . ? 
C17 F8 1.350(3) . ? 
C18 O3 1.427(4) . ? 
C18 H18A 0.9600 . ? 
C18 H18B 0.9600 . ? 
C18 H18C 0.9600 . ? 
C19 O3 1.366(3) . ? 
C19 C24 1.395(3) . ? 
C19 C20 1.395(4) . ? 
C20 C21 1.384(5) . ? 
C20 H20A 0.9300 . ? 
C21 C22 1.367(5) . ? 
C21 H21A 0.9300 . ? 
C22 C23 1.387(4) . ? 
C22 H22A 0.9300 . ? 
C23 C24 1.390(4) . ? 
C23 H23A 0.9300 . ? 
C24 C25 1.491(3) . ? 
C25 C26 1.343(3) . ? 
C25 C30 1.503(3) . ? 
C26 C27 1.502(4) . ? 
C26 C36 1.514(4) . ? 
C27 O2 1.206(3) . ? 
C27 C28 1.490(4) . ? 
C28 C29 1.392(4) . ? 
C28 C32 1.397(4) . ? 
C29 C31 1.406(4) . ? 
C29 C30 1.469(3) . ? 
C30 O1 1.217(3) . ? 
C31 C33 1.382(4) . ? 
C31 H31A 0.9300 . ? 
C32 C34 1.363(5) . ? 
C32 H32A 0.9300 . ? 
C33 C34 1.375(5) . ? 
C33 H33A 0.9300 . ? 
C34 F1 1.355(3) . ? 
C35 F7 1.313(4) . ? 
C35 F5 1.315(3) . ? 
C35 F6 1.316(4) . ? 
C36 F2 1.303(4) . ? 
C36 F3 1.311(4) . ? 
C36 F4 1.327(4) . ? 
 
loop_ 
 _geom_angle_atom_site_label_1 
 _geom_angle_atom_site_label_2 
 _geom_angle_atom_site_label_3 
 _geom_angle 
 _geom_angle_site_symmetry_1 
 _geom_angle_site_symmetry_3 
 _geom_angle_publ_flag 
O6 C1 H1A 109.5 . . ? 
O6 C1 H1B 109.5 . . ? 
H1A C1 H1B 109.5 . . ? 
O6 C1 H1C 109.5 . . ? 
H1A C1 H1C 109.5 . . ? 
H1B C1 H1C 109.5 . . ? 
O6 C2 C3 114.2(2) . . ? 
O6 C2 C7 126.1(3) . . ? 
C3 C2 C7 119.6(3) . . ? 
C4 C3 C2 119.7(2) . . ? 
C4 C3 C8 121.8(2) . . ? 
C2 C3 C8 118.4(2) . . ? 
C3 C4 C5 120.6(3) . . ? 
C3 C4 H4A 119.7 . . ? 
C5 C4 H4A 119.7 . . ? 
C6 C5 C4 119.3(3) . . ? 
C6 C5 H5A 120.4 . . ? 
C4 C5 H5A 120.4 . . ? 
C5 C6 C7 121.6(3) . . ? 
C5 C6 H6A 119.2 . . ? 
C7 C6 H6A 119.2 . . ? 
C6 C7 C2 119.2(3) . . ? 
C6 C7 H7A 120.4 . . ? 
C2 C7 H7A 120.4 . . ? 
C13 C8 C3 126.5(2) . . ? 
C13 C8 C9 120.0(2) . . ? 
C3 C8 C9 113.5(2) . . ? 
O5 C9 C14 121.8(2) . . ? 
O5 C9 C8 119.2(2) . . ? 
C14 C9 C8 119.0(2) . . ? 
C17 C10 C11 118.7(3) . . ? 
C17 C10 H10A 120.7 . . ? 
C11 C10 H10A 120.7 . . ? 
C14 C11 C10 119.7(3) . . ? 
C14 C11 C12 121.0(2) . . ? 
C10 C11 C12 119.3(3) . . ? 
O4 C12 C11 121.8(2) . . ? 
O4 C12 C13 120.7(2) . . ? 
C11 C12 C13 117.4(2) . . ? 
C8 C13 C12 121.8(2) . . ? 
C8 C13 C35 123.8(2) . . ? 
C12 C13 C35 114.4(2) . . ? 
C11 C14 C15 120.2(2) . . ? 
C11 C14 C9 120.0(2) . . ? 
C15 C14 C9 119.8(2) . . ? 
C16 C15 C14 119.8(3) . . ? 
C16 C15 H15A 120.1 . . ? 
C14 C15 H15A 120.1 . . ? 
C17 C16 C15 118.3(3) . . ? 
C17 C16 H16A 120.9 . . ? 
C15 C16 H16A 120.9 . . ? 
F8 C17 C10 119.0(3) . . ? 
F8 C17 C16 117.7(3) . . ? 
C10 C17 C16 123.4(3) . . ? 
O3 C18 H18A 109.5 . . ? 
O3 C18 H18B 109.5 . . ? 
H18A C18 H18B 109.5 . . ? 
O3 C18 H18C 109.5 . . ? 
H18A C18 H18C 109.5 . . ? 
H18B C18 H18C 109.5 . . ? 
O3 C19 C24 114.8(2) . . ? 
O3 C19 C20 125.3(2) . . ? 
C24 C19 C20 119.8(3) . . ? 
C21 C20 C19 119.6(3) . . ? 
C21 C20 H20A 120.2 . . ? 
C19 C20 H20A 120.2 . . ? 
C22 C21 C20 121.0(3) . . ? 
C22 C21 H21A 119.5 . . ? 
C20 C21 H21A 119.5 . . ? 
C21 C22 C23 119.9(3) . . ? 
C21 C22 H22A 120.1 . . ? 
C23 C22 H22A 120.1 . . ? 
C22 C23 C24 120.4(3) . . ? 
C22 C23 H23A 119.8 . . ? 
C24 C23 H23A 119.8 . . ? 
C23 C24 C19 119.3(2) . . ? 
C23 C24 C25 121.5(2) . . ? 
C19 C24 C25 119.1(2) . . ? 
C26 C25 C24 126.1(2) . . ? 
C26 C25 C30 120.2(2) . . ? 
C24 C25 C30 113.8(2) . . ? 
C25 C26 C27 121.8(2) . . ? 
C25 C26 C36 123.9(2) . . ? 
C27 C26 C36 114.2(2) . . ? 
O2 C27 C28 121.5(3) . . ? 
O2 C27 C26 121.0(3) . . ? 
C28 C27 C26 117.5(2) . . ? 
C29 C28 C32 120.6(3) . . ? 
C29 C28 C27 120.5(2) . . ? 
C32 C28 C27 118.9(3) . . ? 
C28 C29 C31 119.5(2) . . ? 
C28 C29 C30 120.3(2) . . ? 
C31 C29 C30 120.1(2) . . ? 
O1 C30 C29 121.3(2) . . ? 
O1 C30 C25 119.6(2) . . ? 
C29 C30 C25 119.0(2) . . ? 
C33 C31 C29 119.7(3) . . ? 
C33 C31 H31A 120.2 . . ? 
C29 C31 H31A 120.2 . . ? 
C34 C32 C28 117.8(3) . . ? 
C34 C32 H32A 121.1 . . ? 
C28 C32 H32A 121.1 . . ? 
C34 C33 C31 118.9(3) . . ? 
C34 C33 H33A 120.6 . . ? 
C31 C33 H33A 120.6 . . ? 
F1 C34 C32 117.9(3) . . ? 
F1 C34 C33 118.6(3) . . ? 
C32 C34 C33 123.5(3) . . ? 
F7 C35 F5 106.3(3) . . ? 
F7 C35 F6 107.0(3) . . ? 
F5 C35 F6 106.9(3) . . ? 
F7 C35 C13 113.8(2) . . ? 
F5 C35 C13 110.8(2) . . ? 
F6 C35 C13 111.7(2) . . ? 
F2 C36 F3 107.3(3) . . ? 
F2 C36 F4 106.6(3) . . ? 
F3 C36 F4 104.4(3) . . ? 
F2 C36 C26 112.2(2) . . ? 
F3 C36 C26 114.7(2) . . ? 
F4 C36 C26 110.9(2) . . ? 
C19 O3 C18 117.7(2) . . ? 
C2 O6 C1 117.7(3) . . ? 
 
loop_ 
 _geom_torsion_atom_site_label_1 
 _geom_torsion_atom_site_label_2 
 _geom_torsion_atom_site_label_3 
 _geom_torsion_atom_site_label_4 
 _geom_torsion 
 _geom_torsion_site_symmetry_1 
 _geom_torsion_site_symmetry_2 
 _geom_torsion_site_symmetry_3 
 _geom_torsion_site_symmetry_4 
 _geom_torsion_publ_flag 
O6 C2 C3 C4 179.5(2) . . . . ? 
C7 C2 C3 C4 0.6(4) . . . . ? 
O6 C2 C3 C8 -2.5(3) . . . . ? 
C7 C2 C3 C8 178.6(2) . . . . ? 
C2 C3 C4 C5 -0.4(4) . . . . ? 
C8 C3 C4 C5 -178.4(3) . . . . ? 
C3 C4 C5 C6 -0.2(5) . . . . ? 
C4 C5 C6 C7 0.6(5) . . . . ? 
C5 C6 C7 C2 -0.4(5) . . . . ? 
O6 C2 C7 C6 -179.0(3) . . . . ? 
C3 C2 C7 C6 -0.2(4) . . . . ? 
C4 C3 C8 C13 -85.4(4) . . . . ? 
C2 C3 C8 C13 96.6(3) . . . . ? 
C4 C3 C8 C9 94.3(3) . . . . ? 
C2 C3 C8 C9 -83.6(3) . . . . ? 
C13 C8 C9 O5 172.4(3) . . . . ? 
C3 C8 C9 O5 -7.4(4) . . . . ? 
C13 C8 C9 C14 -7.2(4) . . . . ? 
C3 C8 C9 C14 173.0(2) . . . . ? 
C17 C10 C11 C14 1.4(4) . . . . ? 
C17 C10 C11 C12 180.0(3) . . . . ? 
C14 C11 C12 O4 171.4(3) . . . . ? 
C10 C11 C12 O4 -7.2(4) . . . . ? 
C14 C11 C12 C13 -7.3(4) . . . . ? 
C10 C11 C12 C13 174.1(2) . . . . ? 
C3 C8 C13 C12 -179.8(2) . . . . ? 
C9 C8 C13 C12 0.4(4) . . . . ? 
C3 C8 C13 C35 0.0(4) . . . . ? 
C9 C8 C13 C35 -179.7(2) . . . . ? 
O4 C12 C13 C8 -172.0(3) . . . . ? 
C11 C12 C13 C8 6.7(4) . . . . ? 
O4 C12 C13 C35 8.1(4) . . . . ? 
C11 C12 C13 C35 -173.2(2) . . . . ? 
C10 C11 C14 C15 -0.7(4) . . . . ? 
C12 C11 C14 C15 -179.3(2) . . . . ? 
C10 C11 C14 C9 179.3(3) . . . . ? 
C12 C11 C14 C9 0.7(4) . . . . ? 
O5 C9 C14 C11 -172.9(3) . . . . ? 
C8 C9 C14 C11 6.6(4) . . . . ? 
O5 C9 C14 C15 7.0(4) . . . . ? 
C8 C9 C14 C15 -173.5(2) . . . . ? 
C11 C14 C15 C16 0.0(4) . . . . ? 
C9 C14 C15 C16 -180.0(3) . . . . ? 
C14 C15 C16 C17 0.1(5) . . . . ? 
C11 C10 C17 F8 178.6(3) . . . . ? 
C11 C10 C17 C16 -1.4(5) . . . . ? 
C15 C16 C17 F8 -179.3(3) . . . . ? 
C15 C16 C17 C10 0.7(5) . . . . ? 
O3 C19 C20 C21 179.5(3) . . . . ? 
C24 C19 C20 C21 0.1(4) . . . . ? 
C19 C20 C21 C22 0.2(4) . . . . ? 
C20 C21 C22 C23 0.0(5) . . . . ? 
C21 C22 C23 C24 -0.5(5) . . . . ? 
C22 C23 C24 C19 0.8(4) . . . . ? 
C22 C23 C24 C25 179.0(3) . . . . ? 
O3 C19 C24 C23 179.9(2) . . . . ? 
C20 C19 C24 C23 -0.6(4) . . . . ? 
O3 C19 C24 C25 1.7(3) . . . . ? 
C20 C19 C24 C25 -178.9(2) . . . . ? 
C23 C24 C25 C26 85.5(4) . . . . ? 
C19 C24 C25 C26 -96.3(3) . . . . ? 
C23 C24 C25 C30 -93.7(3) . . . . ? 
C19 C24 C25 C30 84.5(3) . . . . ? 
C24 C25 C26 C27 -179.8(2) . . . . ? 
C30 C25 C26 C27 -0.6(4) . . . . ? 
C24 C25 C26 C36 1.5(4) . . . . ? 
C30 C25 C26 C36 -179.3(2) . . . . ? 
C25 C26 C27 O2 174.2(3) . . . . ? 
C36 C26 C27 O2 -6.9(4) . . . . ? 
C25 C26 C27 C28 -5.6(4) . . . . ? 
C36 C26 C27 C28 173.2(2) . . . . ? 
O2 C27 C28 C29 -173.8(3) . . . . ? 
C26 C27 C28 C29 6.1(4) . . . . ? 
O2 C27 C28 C32 5.3(4) . . . . ? 
C26 C27 C28 C32 -174.9(2) . . . . ? 
C32 C28 C29 C31 1.4(4) . . . . ? 
C27 C28 C29 C31 -179.6(2) . . . . ? 
C32 C28 C29 C30 -179.3(3) . . . . ? 
C27 C28 C29 C30 -0.3(4) . . . . ? 
C28 C29 C30 O1 173.2(3) . . . . ? 
C31 C29 C30 O1 -7.5(4) . . . . ? 
C28 C29 C30 C25 -6.1(4) . . . . ? 
C31 C29 C30 C25 173.2(2) . . . . ? 
C26 C25 C30 O1 -172.7(3) . . . . ? 
C24 C25 C30 O1 6.5(4) . . . . ? 
C26 C25 C30 C29 6.6(4) . . . . ? 
C24 C25 C30 C29 -174.2(2) . . . . ? 
C28 C29 C31 C33 -1.1(4) . . . . ? 
C30 C29 C31 C33 179.6(3) . . . . ? 
C29 C28 C32 C34 -1.5(4) . . . . ? 
C27 C28 C32 C34 179.5(3) . . . . ? 
C29 C31 C33 C34 0.9(5) . . . . ? 
C28 C32 C34 F1 -178.7(3) . . . . ? 
C28 C32 C34 C33 1.3(5) . . . . ? 
C31 C33 C34 F1 179.0(3) . . . . ? 
C31 C33 C34 C32 -1.1(5) . . . . ? 
C8 C13 C35 F7 -9.0(4) . . . . ? 
C12 C13 C35 F7 170.9(3) . . . . ? 
C8 C13 C35 F5 110.7(3) . . . . ? 
C12 C13 C35 F5 -69.4(3) . . . . ? 
C8 C13 C35 F6 -130.2(3) . . . . ? 
C12 C13 C35 F6 49.6(3) . . . . ? 
C25 C26 C36 F2 127.9(3) . . . . ? 
C27 C26 C36 F2 -50.9(3) . . . . ? 
C25 C26 C36 F3 5.1(4) . . . . ? 
C27 C26 C36 F3 -173.7(3) . . . . ? 
C25 C26 C36 F4 -112.9(3) . . . . ? 
C27 C26 C36 F4 68.3(3) . . . . ? 
C24 C19 O3 C18 -179.7(3) . . . . ? 
C20 C19 O3 C18 0.8(4) . . . . ? 
C3 C2 O6 C1 -176.1(3) . . . . ? 
C7 C2 O6 C1 2.7(4) . . . . ? 
 
_diffrn_measured_fraction_theta_max    0.950 
_diffrn_reflns_theta_full              27.51 
_diffrn_measured_fraction_theta_full   0.950 
_refine_diff_density_max    0.807 
_refine_diff_density_min   -0.378 
_refine_diff_density_rms    0.097 

_vrf_PLAT029_a
;
PROBLEM:  diffrn_measured_fraction_theta_full value Low .      0.950 Note ? 
RESPONSE: We made several attempts to obtain better quality data for
this structure, after a number of attempts of data collection, the 
reported one is found to be the best one. 
;

_vrf_SYMMS02_a
;
PROBLEM:  Two angles should be 90 for a monoclinic cell
  Cell       9.7735   12.0104   13.4634
  Angles   106.2750   90.0000   90.0650 

RESPONSE: Although the two angles are almost 90, the cell is not monoclinic. 
The checking program PLATON did not find a symmetry higher than triclinic. If the 
data was averaged in a monoclinic space group C2/c setting, the Rint is equal to 0.072,
but any fragment of the structure is not determined. 
;
